# Supplementary material for: Probing T1–T2 interactions and their imaging implications through a thermally responsive nanoprobe
Source: Royal Society of Chemistry journal article supplement (doi:10.1039/c7nr01733b), 2017-01-01
Supplement: c7nr01733b1.pdf [file c7nr01733b1.pdf]

## Probing $T_1$ - $T_2$ interactions and their imaging implications through a thermally responsive nanoprobe

Juan Gallo<sup>1, \*</sup>, Bethany Harriss<sup>2</sup>, Javier Hernández-Gil<sup>2</sup>, Manuel Bañobre-López<sup>1</sup>, Nicholas J Long<sup>2, \*</sup>

<sup>1</sup> Advanced (magnetic) Theranostic Nanostructures Group, International Iberian Nanotechnology Laboratory, Av. Mestre José Veiga s/n 4715-330 Braga, Portugal

<sup>2</sup> Department of Chemistry, Imperial College London, South Kensington, London, SW7 2AZ, UK

[juan.gallo@inl.int](mailto:juan.gallo@inl.int)

[n.long@imperial.ac.uk](mailto:n.long@imperial.ac.uk)

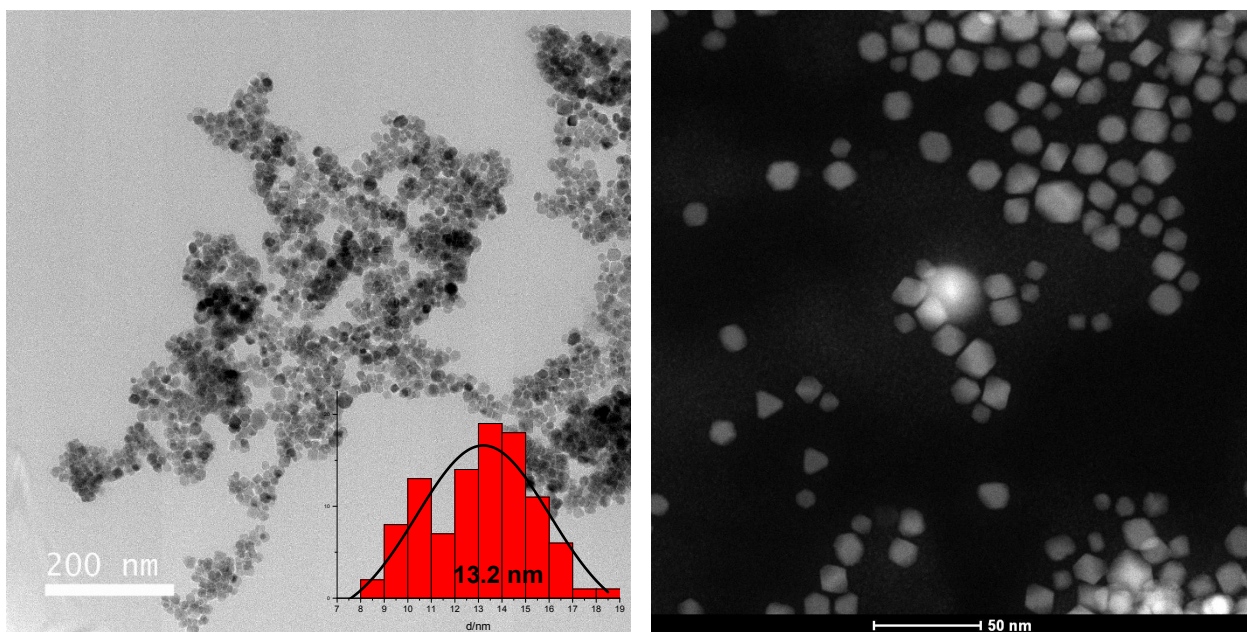

**Figure S1.** TEM (left) and scanning transmission electron microscopy (STEM) (right) images of  $\text{Mn}_x\text{Fe}_{3-x}\text{O}_4$  nanoparticles. Inset, size distribution of the nanoparticles

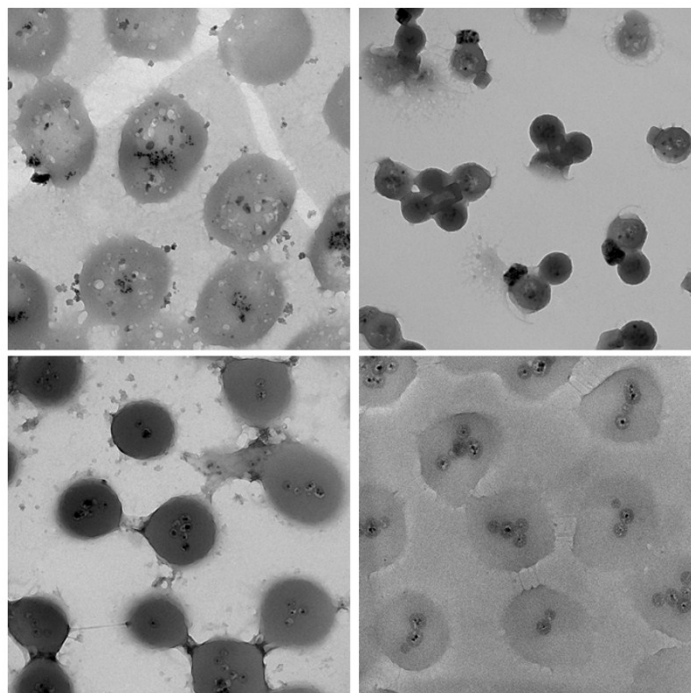

**Figure S2.** Overview TEM micrographs of the final temperature responsive nanoparticles.

**Table 1.** Hydrodynamic diameters of the samples measured in water at 20 and 40 °C.

| <b>Sample</b> | <b><math>D_h</math> (T = 20 °C)</b> | <b><math>D_h</math> (T = 40 °C)</b> |
|---------------|-------------------------------------|-------------------------------------|
| <b>1</b>      | 39 ± 6                              | 37 ± 8                              |
| <b>2</b>      | 40 ± 9                              | 42 ± 7                              |
| <b>3</b>      | 51 ± 9                              | 49 ± 8                              |
| <b>4</b>      | 65 ± 11                             | 67 ± 9                              |
| <b>5</b>      | 482 ± 8                             | 235 ± 11                            |
| <b>6</b>      | 416 ± 15                            | 246 ± 18                            |
| <b>7</b>      | 502 ± 26                            | 222 ± 7                             |
| <b>8</b>      | 497 ± 10                            | 243 ± 2                             |
| <b>9</b>      | 502 ± 19                            | 250 ± 16                            |
| <b>10</b>     | 456 ± 9                             | 212 ± 13                            |
| <b>11</b>     | 478 ± 7                             | 235 ± 7                             |
| <b>12</b>     | 485 ± 5                             | 225 ± 23                            |

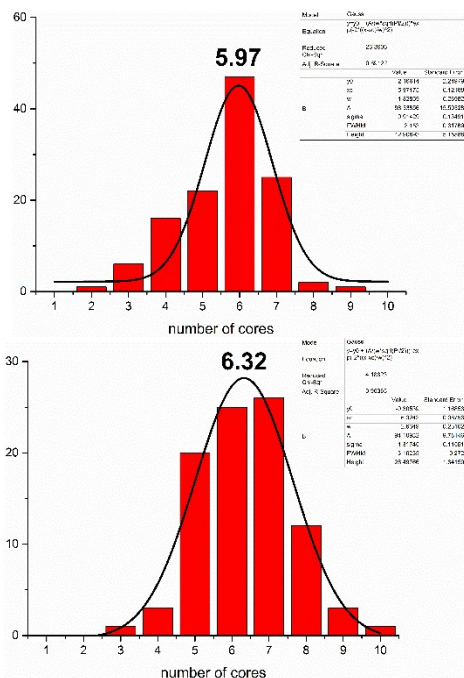

| Sample | Average number of cores |
|--------|-------------------------|
| 1      | n/a                     |
| 2      | n/a                     |
| 3      | n/a                     |
| 4      | n/a                     |
| 5      | 4.56                    |
| 6      | 4.35                    |
| 7      | 4.89                    |
| 8      | 5.97                    |
| 9      | 4.48                    |
| 10     | 4.67                    |
| 11     | 4.77                    |
| 12     | 6.32                    |

**Figure S3.** Left, representative histograms of samples 8 and 12 of the number of magnetic cores per pNIPAM particle. Right, table summarising the average number of magnetic cores per particle for the different samples prepared.

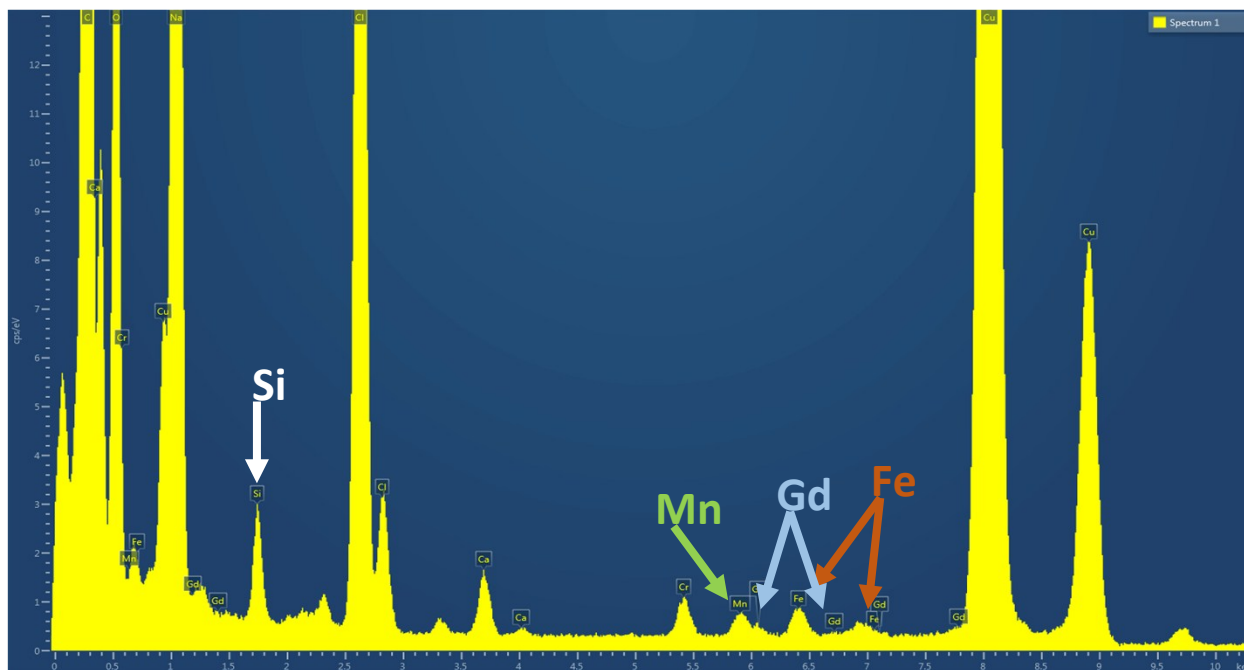

**Figure S4.** EDX spectra of  $\text{Mn}_x\text{Fe}_{3-x}\text{O}_4@\text{SiO}_2@\text{pNIPAM-Gd}^{3+}$  nanoparticles showing peaks from Si (white arrow), Mn (green arrow), Gd (blue arrow) and Fe (brown arrow).

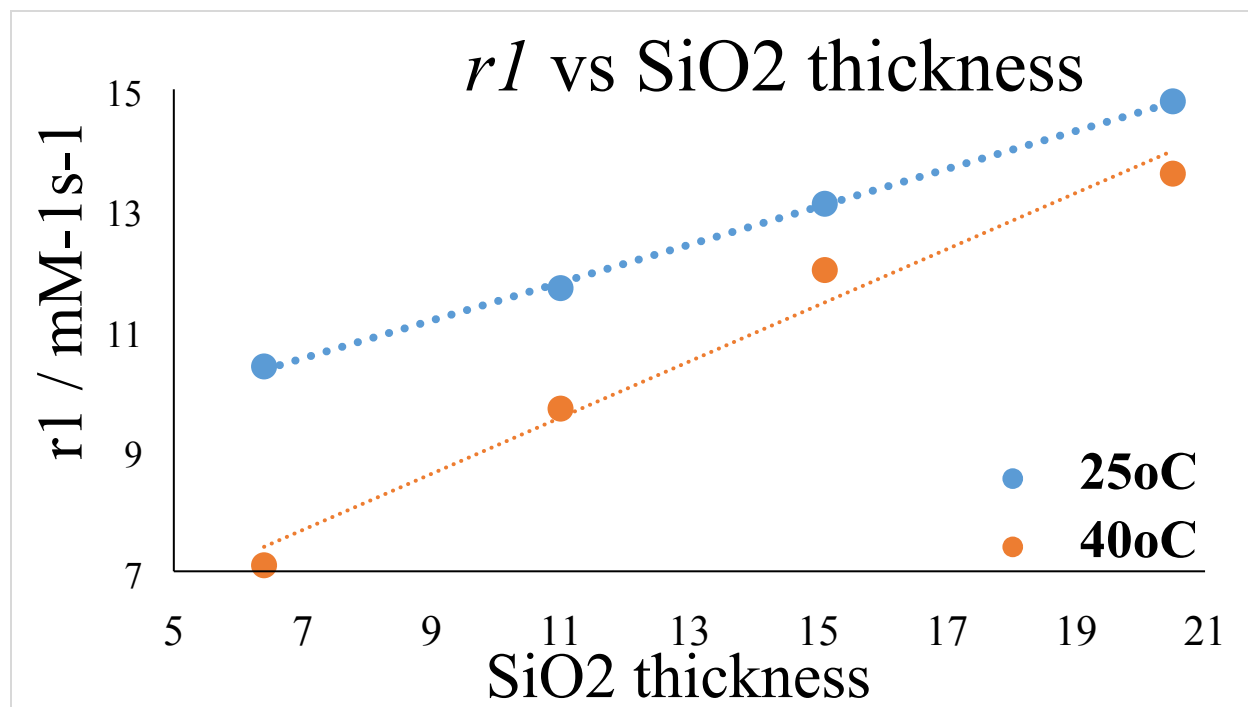

**Figure S5.** Plot showing the linear relationship between the longitudinal relaxivity of samples 5 to 8 and the thickness of the silica layer, both at 25 and 40 °C.

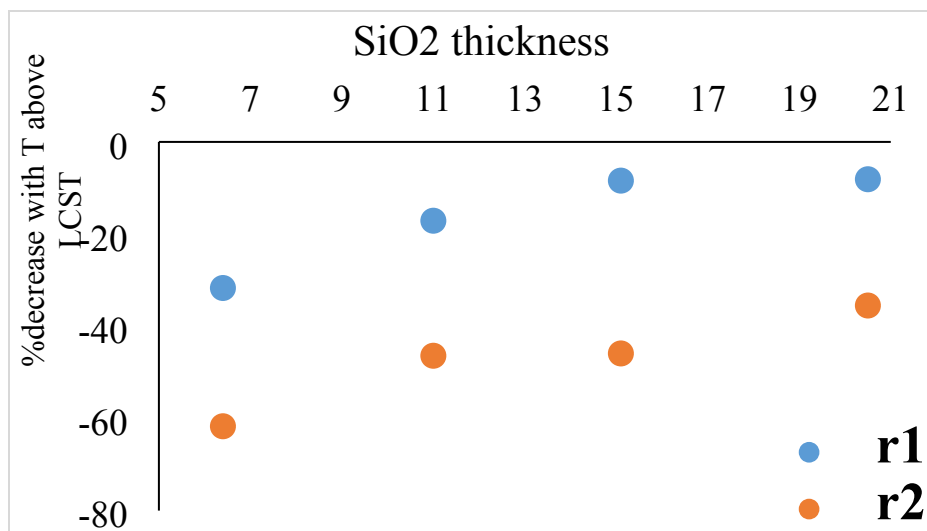

**Figure S6.** Plot showing the decrease of longitudinal and transverse relaxivity of samples **5** to **8** versus the thickness of the silica layer.

$$R_2 = \frac{16}{45} v \tau_D (\gamma B_{eq})^2 \quad (\text{eq 1})^{[1]}$$

**Equation S1.** Transversal relaxation rate in the motion average regime.  $v$ , magnetic volume fraction;  $\tau_D$ , diffusion time;  $\gamma$ , proton gyromagnetic factor;  $B_{eq}$ , nanoparticle equatorial field.

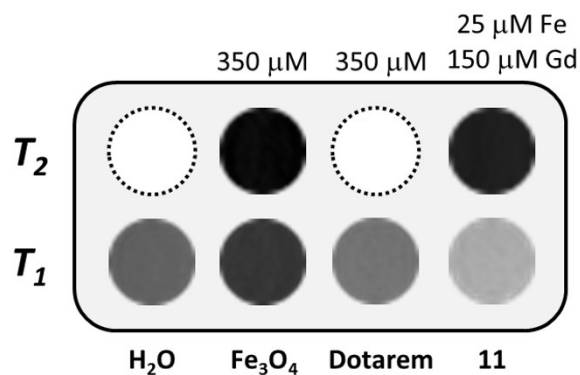

**Figure S7.**  $T_2$  and  $T_1$ -weighted MRI phantoms of sample **11** compared to water, 8 nm  $\text{Fe}_3\text{O}_4$  nanoparticles and Dotarem. Magnetite nanoparticles at a concentration of 350  $\mu\text{M}$  of Fe, Dotarem at a concentration of 350  $\mu\text{M}$   $\text{Gd}^{3+}$ .

[1] M. R. J. Carroll, R. C. Woodward, M. J. House, W. Y. Teoh, R. Amal, T. L. Hanley, T. G. St Pierre, *Nanotechnology* **2010**, 21, 35103.
